# Supplementary material for: Powerline Corridors Can Add Ecological Value to Suburban Landscapes When Not Maintained as Lawn
Source: MDPI journal article supplement (doi:10.3390/su14127113), 2022-06-10
Supplement: s1 [file s1]

# SUPPLEMENT

**Table S1.** AICc ranking of a priori model sets describing four biodiversity response variables. Rows in green are within 2ΔAICc from the best supported model in the set. The null model is highlighted in gray. All predictor variables from all models <2ΔAICc per response variable are reported in Table 1 in the main text. Tree cover and impervious surface cover were scaled.

| <b>Insect Pollinator Genus Richness</b> |                                       | <b>K</b> | <b>AICc</b> | <b>ΔAICc</b> | <b>AICcWt</b> | <b>LL</b> | <b>Cum.Wt</b> |
|-----------------------------------------|---------------------------------------|----------|-------------|--------------|---------------|-----------|---------------|
| 1                                       | Floral cover                          | 4        | 103.84      | 0            | 0.72          | -46.49    | 0.72          |
| 2                                       | Floral cover + Tree cover             | 5        | 105.99      | 2.14         | 0.24          | -45.69    | 0.96          |
| 3                                       | Site type + Floral cover              | 6        | 111.9       | 8.05         | 0.01          | -46.45    | 0.97          |
| 4                                       | Site type + Tree cover                | 6        | 113.05      | 9.2          | 0.01          | -47.02    | 0.98          |
| 5                                       | Site type                             | 5        | 113.21      | 9.37         | 0.01          | -49.3     | 0.99          |
| 6                                       | Null                                  | 3        | 113.51      | 9.66         | 0.01          | -52.95    | 0.99          |
| 7                                       | Site type + Floral cover + Tree cover | 7        | 114.49      | 10.65        | 0             | -45.16    | 1             |
| 8                                       | Impervious surface cover              | 4        | 116.32      | 12.47        | 0             | -52.73    | 1             |
| 9                                       | Tree cover                            | 4        | 116.69      | 12.85        | 0             | -52.92    | 1             |
| 10                                      | Site type + Impervious surface cover  | 6        | 117.24      | 13.4         | 0             | -49.12    | 1             |
| <b>LEPIDOPTERAN Sp. Richness</b>        |                                       | <b>K</b> | <b>AICc</b> | <b>ΔAICc</b> | <b>AICcWt</b> | <b>LL</b> | <b>Cum.Wt</b> |
| 1                                       | Floral cover                          | 4        | 84.06       | 0            | 0.39          | -36.6     | 0.39          |
| 2                                       | Site type + Floral cover              | 6        | 84.94       | 0.88         | 0.25          | -32.97    | 0.63          |
| 3                                       | Site type                             | 5        | 87.06       | 3            | 0.09          | -36.22    | 0.72          |
| 4                                       | Impervious surface cover              | 4        | 87.58       | 3.51         | 0.07          | -38.36    | 0.79          |
| 5                                       | Null                                  | 3        | 87.71       | 3.65         | 0.06          | -40.06    | 0.85          |
| 6                                       | Floral cover + Tree cover             | 5        | 87.81       | 3.75         | 0.06          | -36.6     | 0.91          |
| 7                                       | Site type + Floral cover + Tree cover | 7        | 88.57       | 4.51         | 0.04          | -32.19    | 0.95          |
| 8                                       | Site type + Impervious surface cover  | 6        | 89.25       | 5.19         | 0.03          | -35.13    | 0.98          |
| 9                                       | Tree cover                            | 4        | 90.95       | 6.88         | 0.01          | -40.04    | 0.99          |
| 10                                      | Site type + Tree cover                | 6        | 91.43       | 7.37         | 0.01          | -36.21    | 1             |
| <b>ALL BIRDS Sp. Richness</b>           |                                       | <b>K</b> | <b>AICc</b> | <b>ΔAICc</b> | <b>AICcWt</b> | <b>LL</b> | <b>Cum.Wt</b> |
| 1                                       | Veg density + Tree cover              | 5        | 87.29       | 0            | 0.57          | -36.88    | 0.57          |
| 2                                       | Site type + Tree cover                | 6        | 88.23       | 0.94         | 0.36          | -35.49    | 0.93          |
| 3                                       | Site type + Veg density + Tree cover  | 7        | 91.69       | 4.4          | 0.06          | -35.11    | 0.99          |
| 4                                       | Tree cover                            | 4        | 95.64       | 8.35         | 0.01          | -42.71    | 1             |
| 5                                       | Null                                  | 3        | 102.19      | 14.9         | 0             | -47.46    | 1             |
| 6                                       | Veg density                           | 4        | 102.19      | 14.9         | 0             | -45.98    | 1             |
| 7                                       | Impervious surface cover              | 4        | 104.52      | 17.23        | 0             | -47.15    | 1             |
| 8                                       | Site type                             | 5        | 105.06      | 17.77        | 0             | -45.77    | 1             |

|    |                                      |   |        |       |   |        |   |
|----|--------------------------------------|---|--------|-------|---|--------|---|
| 9  | Site type + Impervious surface cover | 6 | 106.55 | 19.26 | 0 | -44.65 | 1 |
| 10 | Site type + Veg density              | 6 | 107.5  | 20.21 | 0 | -45.12 | 1 |

**CORRIDOR BIRDS Sp.**

|    | <b>Richness</b>                      | <b>K</b> | <b>AICc</b> | <b>Delta AICc</b> | <b>AICcWt</b> | <b>LL</b> | <b>Cum.Wt</b> |
|----|--------------------------------------|----------|-------------|-------------------|---------------|-----------|---------------|
| 1  | Veg density                          | 4        | 101.06      | 0.00              | 0.66          | 45.42     | 0.66          |
| 2  | Veg density + Tree cover             | 5        | 104.35      | 3.29              | 0.13          | 45.41     | 0.79          |
| 3  | Site type + Veg density              | 6        | 104.44      | 3.39              | 0.12          | 43.60     | 0.91          |
| 4  | Site type                            | 5        | 107.19      | 6.13              | 0.03          | 46.83     | 0.94          |
| 5  | Site type + Veg density + Tree cover | 7        | 108.12      | 7.06              | 0.02          | 43.33     | 0.96          |
| 6  | Impervious surface cover             | 4        | 109.38      | 8.32              | 0.01          | 49.58     | 0.97          |
| 7  | Null                                 | 3        | 109.42      | 8.36              | 0.01          | 51.08     | 0.98          |
| 8  | Site type + Impervious surface cover | 6        | 109.93      | 8.87              | 0.01          | 46.34     | 0.99          |
| 9  | Management + Tree cover              | 6        | 110.68      | 9.63              | 0.01          | 46.72     | 1.00          |
| 10 | Tree cover                           | 4        | 110.87      | 9.81              | 0.00          | 50.32     | 1.00          |
